# Supplementary material
Source: PubMed Central journal article supplement (PMC5972776)
Supplement: Supp_Table1.pdf [file Supp_Table1.pdf]

## Supplementary Data

SUPPLEMENTARY TABLE S1. INTRAPATIENT MUTATIONS IN HIV V3 LOOP SEQUENCES OF VARIOUS TISSUES AND ORGANS COMPARED TO THE LIVER

| <i>HXB2 gp120</i><br>(C296-C301) | *        |          |          |          |          |          |          |          |          |          |          |          |          |          |          |          | *        |          |          |          |          |          |          |          |          |          |          |          |          |          |          |          |          |          |          |   |   |   |
|----------------------------------|----------|----------|----------|----------|----------|----------|----------|----------|----------|----------|----------|----------|----------|----------|----------|----------|----------|----------|----------|----------|----------|----------|----------|----------|----------|----------|----------|----------|----------|----------|----------|----------|----------|----------|----------|---|---|---|
|                                  | <i>C</i> | <i>T</i> | <i>R</i> | <i>P</i> | <i>N</i> | <i>N</i> | <i>N</i> | <i>T</i> | <i>R</i> | <i>K</i> | <i>R</i> | <i>I</i> | <i>Q</i> | <i>R</i> | <i>G</i> | <i>P</i> | <i>G</i> | <i>R</i> | <i>A</i> | <i>F</i> | <i>V</i> | <i>T</i> | <i>I</i> | <i>G</i> | -        | <i>K</i> | <i>I</i> | <i>G</i> | <i>N</i> | <i>M</i> | <i>R</i> | <i>Q</i> | <i>A</i> | <i>H</i> | <i>C</i> |   |   |   |
| Liver signature                  | .        | <b>T</b> | .        | .        | .        | .        | .        | .        | .        | .        | .        | .        | .        | .        | .        | .        | .        | <b>K</b> | .        | .        | .        | <b>T</b> | .        | .        | <b>E</b> | .        | .        | .        | .        | .        | .        | .        | .        | .        | .        | . | . |   |
| Bone marrow signature            | .        | <b>I</b> | .        | .        | .        | .        | .        | .        | .        | .        | .        | .        | .        | .        | .        | .        | .        | <b>R</b> | .        | .        | .        | <b>A</b> | .        | .        | <b>D</b> | .        | .        | .        | .        | .        | .        | .        | .        | .        | .        | . | . |   |
| Threshold signature              | .        | <b>T</b> | .        | .        | .        | .        | .        | .        | .        | .        | .        | .        | .        | .        | .        | .        | .        | <b>K</b> | .        | .        | .        | <b>T</b> | .        | .        | <b>E</b> | .        | .        | .        | .        | .        | .        | .        | .        | .        | .        | . | . |   |
| Liver signature                  | .        | .        | .        | .        | .        | .        | .        | .        | .        | .        | <b>I</b> | -        | -        | .        | .        | .        | .        | .        | .        | .        | .        | <b>T</b> | .        | .        | <b>E</b> | .        | .        | .        | <b>N</b> | .        | .        | .        | .        | .        | .        | . | . |   |
| Brain signature                  | .        | .        | .        | .        | .        | .        | .        | .        | .        | .        | <b>M</b> | -        | -        | .        | .        | .        | .        | .        | .        | .        | .        | <b>A</b> | .        | .        | <b>D</b> | .        | .        | .        | <b>D</b> | .        | .        | .        | .        | .        | .        | . | . |   |
| Threshold signature              | .        | .        | .        | .        | .        | .        | .        | .        | .        | .        | <b>I</b> | -        | -        | .        | .        | .        | .        | .        | .        | .        | .        | <b>T</b> | .        | .        | <b>E</b> | .        | .        | .        | <b>N</b> | .        | .        | .        | .        | .        | .        | . | . |   |
| Liver signature                  | .        | .        | .        | .        | .        | .        | .        | .        | .        | .        | .        | .        | .        | .        | .        | .        | .        | .        | .        | .        | .        | <b>T</b> | .        | .        | <b>E</b> | .        | .        | .        | <b>N</b> | .        | .        | .        | .        | .        | .        | . | . |   |
| CSF signature                    | .        | .        | .        | .        | .        | .        | .        | .        | .        | .        | .        | .        | .        | .        | .        | .        | .        | .        | .        | .        | .        | <b>A</b> | .        | .        | <b>D</b> | .        | .        | .        | <b>D</b> | .        | .        | .        | .        | .        | .        | . | . |   |
| Threshold signature              | .        | .        | .        | .        | .        | .        | .        | .        | .        | .        | .        | .        | .        | .        | .        | .        | .        | .        | .        | .        | .        | <b>T</b> | .        | .        | <b>E</b> | .        | .        | .        | <b>N</b> | .        | .        | .        | .        | .        | .        | . | . |   |
| Liver signature                  | .        | <b>T</b> | .        | .        | .        | .        | .        | .        | .        | .        | .        | .        | .        | .        | .        | .        | .        | <b>K</b> | .        | .        | .        | <b>T</b> | .        | .        | .        | .        | .        | .        | .        | .        | .        | .        | .        | .        | .        | . | . |   |
| Kidney signature                 | .        | <b>V</b> | .        | .        | .        | .        | .        | .        | .        | .        | .        | .        | .        | .        | .        | .        | .        | <b>R</b> | .        | .        | .        | <b>A</b> | .        | .        | .        | .        | .        | .        | .        | .        | .        | .        | .        | .        | .        | . | . | . |
| Threshold signature              | .        | <b>T</b> | .        | .        | .        | .        | .        | .        | .        | .        | .        | .        | .        | .        | .        | .        | .        | <b>K</b> | .        | .        | .        | <b>T</b> | .        | .        | .        | .        | .        | .        | .        | .        | .        | .        | .        | .        | .        | . | . | . |
| Liver signature                  | .        | .        | .        | .        | .        | .        | .        | .        | .        | .        | .        | .        | .        | .        | .        | .        | .        | <b>K</b> | .        | .        | .        | <b>T</b> | .        | .        | <b>E</b> | .        | .        | .        | <b>N</b> | .        | .        | .        | .        | .        | .        | . | . | . |
| Lung signature                   | .        | .        | .        | .        | .        | .        | .        | .        | .        | .        | .        | .        | .        | .        | .        | .        | .        | <b>R</b> | .        | .        | .        | <b>A</b> | .        | .        | <b>D</b> | .        | .        | .        | <b>D</b> | .        | .        | .        | .        | .        | .        | . | . | . |
| Threshold signature              | .        | .        | .        | .        | .        | .        | .        | .        | .        | .        | .        | .        | .        | .        | .        | .        | .        | <b>K</b> | .        | .        | .        | <b>T</b> | .        | .        | <b>E</b> | .        | .        | .        | <b>N</b> | .        | .        | .        | .        | .        | .        | . | . | . |
| Liver signature                  | .        | <b>T</b> | .        | .        | .        | .        | .        | .        | .        | .        | .        | .        | .        | .        | .        | .        | .        | <b>K</b> | .        | .        | .        | <b>T</b> | .        | .        | .        | .        | .        | .        | .        | .        | .        | .        | .        | .        | .        | . | . | . |
| Lymph node signature             | .        | <b>V</b> | .        | .        | .        | .        | .        | .        | .        | .        | .        | .        | .        | .        | .        | .        | .        | <b>R</b> | .        | .        | .        | <b>A</b> | .        | .        | .        | .        | .        | .        | .        | .        | .        | .        | .        | .        | .        | . | . | . |
| Threshold signature              | .        | <b>T</b> | .        | .        | .        | .        | .        | .        | .        | .        | .        | .        | .        | .        | .        | .        | .        | <b>K</b> | .        | .        | .        | <b>T</b> | .        | .        | .        | .        | .        | .        | .        | .        | .        | .        | .        | .        | .        | . | . | . |
| Liver signature                  | .        | <b>T</b> | .        | .        | .        | .        | .        | .        | .        | .        | .        | .        | .        | .        | .        | .        | .        | <b>K</b> | .        | .        | .        | <b>T</b> | .        | .        | .        | .        | .        | .        | .        | .        | .        | .        | .        | .        | .        | . | . | . |
| PBMC signature                   | .        | <b>I</b> | .        | .        | .        | .        | .        | .        | .        | .        | .        | .        | .        | .        | .        | .        | .        | <b>R</b> | .        | .        | .        | <b>A</b> | .        | .        | .        | .        | .        | .        | .        | .        | .        | .        | .        | .        | .        | . | . | . |
| Threshold signature              | .        | <b>T</b> | .        | .        | .        | .        | .        | .        | .        | .        | .        | .        | .        | .        | .        | .        | .        | <b>K</b> | .        | .        | .        | <b>T</b> | .        | .        | .        | .        | .        | .        | .        | .        | .        | .        | .        | .        | .        | . | . | . |
| Liver signature                  | .        | <b>T</b> | .        | .        | .        | .        | .        | .        | .        | .        | .        | .        | .        | .        | .        | .        | .        | <b>K</b> | .        | .        | .        | .        | .        | .        | .        | .        | .        | .        | .        | .        | .        | .        | .        | .        | .        | . | . | . |
| Spleen signature                 | .        | <b>V</b> | .        | .        | .        | .        | .        | .        | .        | .        | .        | .        | .        | .        | .        | .        | .        | <b>R</b> | .        | .        | .        | .        | .        | .        | .        | .        | .        | .        | .        | .        | .        | .        | .        | .        | .        | . | . | . |
| Threshold signature              | .        | <b>T</b> | .        | .        | .        | .        | .        | .        | .        | .        | .        | .        | .        | .        | .        | .        | .        | <b>K</b> | .        | .        | .        | .        | .        | .        | .        | .        | .        | .        | .        | .        | .        | .        | .        | .        | .        | . | . | . |

\*Coreceptor binding site in HXB2.

Amino acid differences between the V3 loop in the liver and other tissues were included only if the amino acid was conserved at a frequency of 0.8 in the liver. Dots represent no difference between residues of the liver and the other tissue. Dashes represent insertions and/or deletions relative to HXB2. The conserved GPCR tip of the V3 loop is in bold and italics and mutations here are in bold.

Sequence data were originally reported in Van't Wout *et al.*<sup>19</sup>

CSF, cerebral spinal fluid; PBMC, peripheral blood mononuclear cells.
