# Supplementary material
Source: PubMed Central journal article supplement (PMC5972776)
Supplement: Supp_Table5.pdf [file Supp_Table5.pdf]

SUPPLEMENTARY TABLE S5. INTRAPATIENT MUTATIONS IN HIV *nef* SEQUENCES OF VARIOUS TISSUES AND ORGANS COMPARED TO THE LIVER FOR PATIENT DY, PATIENT AZ, AND PATIENT AM

| <i>Patient DY</i>       |    |     |     |     |     |     |     |     |     |     |     |
|-------------------------|----|-----|-----|-----|-----|-----|-----|-----|-----|-----|-----|
| <i>Position in HXB2</i> | 11 | 14  | 51  | 64  | -   | 81  | 198 |     |     |     |     |
| <i>Residue in HXB2</i>  | I  | P   | T   | E   | -   | Y   | L   |     |     |     |     |
| Liver                   | .  | .   | .   | .   | G   | Y   | .   |     |     |     |     |
| Basal ganglia           | .  | .   | .   | .   | E   | F   | .   |     |     |     |     |
| Threshold               | .  | .   | .   | .   | G   | Y   | .   |     |     |     |     |
| Liver                   | R  | .   | .   | .   | G   | Y   | .   |     |     |     |     |
| Frontal lobe GM         | K  | .   | .   | .   | E   | F   | .   |     |     |     |     |
| Threshold               | R  | .   | .   | .   | G   | Y   | .   |     |     |     |     |
| Liver                   | .  | D   | Y   | E   | G   | Y   | .   |     |     |     |     |
| Frontal lobe WM         | .  | N   | H   | D   | E   | F   | .   |     |     |     |     |
| Threshold               | .  | D   | Y   | E   | G   | Y   | .   |     |     |     |     |
| Liver                   | R  | .   | .   | .   | G   | Y   | I   |     |     |     |     |
| Lymph node              | K  | .   | .   | .   | K   | F   | M   |     |     |     |     |
| Threshold               | R  | .   | .   | .   | G   | Y   | I   |     |     |     |     |
| Liver                   | .  | .   | .   | .   | G   | Y   | I   |     |     |     |     |
| Meninges                | .  | .   | .   | .   | K   | F   | M   |     |     |     |     |
| Threshold               | .  | .   | .   | .   | G   | Y   | I   |     |     |     |     |
| Liver                   | R  | .   | .   | .   | .   | .   | I   |     |     |     |     |
| Spleen                  | K  | .   | .   | .   | .   | .   | M   |     |     |     |     |
| Threshold               | R  | .   | .   | .   | .   | .   | I   |     |     |     |     |
| Liver                   | .  | .   | .   | E   | G   | Y   | .   |     |     |     |     |
| Temporal cortex         | .  | .   | .   | D   | E   | F   | .   |     |     |     |     |
| Threshold               | .  | .   | .   | E   | G   | Y   | .   |     |     |     |     |
| <i>Patient AZ</i>       |    |     |     |     |     |     |     |     |     |     |     |
| <i>Position in HXB2</i> | 21 | 182 | 194 |     |     |     |     |     |     |     |     |
| <i>Residue in HXB2</i>  | R  | E   | V   |     |     |     |     |     |     |     |     |
| Liver                   | .  | V   | V   |     |     |     |     |     |     |     |     |
| Frontal cortex          | .  | M   | I   |     |     |     |     |     |     |     |     |
| Threshold               | .  | V   | V   |     |     |     |     |     |     |     |     |
| Liver                   | .  | .   | V   |     |     |     |     |     |     |     |     |
| Lymph node              | .  | .   | I   |     |     |     |     |     |     |     |     |
| Threshold               | .  | .   | V   |     |     |     |     |     |     |     |     |
| Liver                   | R  | .   | V   |     |     |     |     |     |     |     |     |
| Meninges                | K  | .   | I   |     |     |     |     |     |     |     |     |
| Threshold               | R  | .   | V   |     |     |     |     |     |     |     |     |
| Liver                   | .  | .   | V   |     |     |     |     |     |     |     |     |
| Spleen                  | .  | .   | I   |     |     |     |     |     |     |     |     |
| Threshold               | .  | .   | V   |     |     |     |     |     |     |     |     |
| <i>Patient AM</i>       |    |     |     |     |     |     |     |     |     |     |     |
| <i>Position in HXB2</i> | 51 | 71  | 108 | 133 | 137 | 179 | 182 | 184 | 188 | 192 | 203 |
| <i>Residue in HXB2</i>  | T  | T   | D   | V   | L   | E   | E   | R   | R   | H   | F   |
| Liver                   | T  | .   | E   | V   | .   | .   | Q   | K   | R   | H   | Y   |
| Diaphragm               | N  | .   | D   | I   | .   | .   | E   | R   | L   | R   | F   |
| Threshold               | T  | .   | E   | V   | .   | .   | Q   | K   | R   | H   | Y   |
| Liver                   | .  | T   | .   | .   | .   | E   | .   | .   | .   | .   | .   |
| Kidney                  | .  | K   | .   | .   | .   | K   | .   | .   | .   | .   | .   |
| Threshold               | .  | T   | .   | .   | .   | E   | .   | .   | .   | .   | .   |
| Liver                   | .  | .   | .   | .   | L   | .   | .   | .   | .   | .   | .   |
| Left lymph node         | .  | .   | .   | .   | V   | .   | .   | .   | .   | .   | .   |
| Threshold               | .  | .   | .   | .   | L   | .   | .   | .   | .   | .   | .   |
| Liver                   | T  | .   | E   | .   | .   | .   | .   | .   | .   | .   | .   |
| Right lymph node        | N  | .   | D   | .   | .   | .   | .   | .   | .   | .   | .   |
| Threshold               | T  | .   | E   | .   | .   | .   | .   | .   | .   | .   | .   |

(continued)

SUPPLEMENTARY TABLE S5. (CONTINUED)

|                         | <i>Patient AM</i> |           |            |            |            |            |            |            |            |            |            |
|-------------------------|-------------------|-----------|------------|------------|------------|------------|------------|------------|------------|------------|------------|
| <i>Position in HXB2</i> | <b>51</b>         | <b>71</b> | <b>108</b> | <b>133</b> | <b>137</b> | <b>179</b> | <b>182</b> | <b>184</b> | <b>188</b> | <b>192</b> | <b>203</b> |
| <i>Residue in HXB2</i>  | <b>T</b>          | <b>T</b>  | <b>D</b>   | <b>V</b>   | <b>L</b>   | <b>E</b>   | <b>E</b>   | <b>R</b>   | <b>R</b>   | <b>H</b>   | <b>F</b>   |
| Liver                   | .                 | T         | .          | .          | .          | .          | .          | .          | .          | .          | .          |
| Liver tumor (1)         | .                 | R         | .          | .          | .          | .          | .          | .          | .          | .          | .          |
| Threshold               | .                 | T         | .          | .          | .          | .          | .          | .          | .          | .          | .          |
| Liver                   | .                 | T         | .          | .          | .          | .          | .          | .          | .          | .          | .          |
| Liver tumor (2)         | .                 | K         | .          | .          | .          | .          | .          | .          | .          | .          | .          |
| Threshold               | .                 | T         | .          | .          | .          | .          | .          | .          | .          | .          | .          |
| Liver                   | T                 | .         | .          | .          | .          | .          | .          | .          | .          | .          | .          |
| Prostate                | N                 | .         | .          | .          | .          | .          | .          | .          | .          | .          | .          |
| Threshold               | T                 | .         | .          | .          | .          | .          | .          | .          | .          | .          | .          |
| Liver                   | .                 | .         | E          | .          | .          | .          | .          | .          | .          | .          | .          |
| Spleen                  | .                 | .         | D          | .          | .          | .          | .          | .          | .          | .          | .          |
| Threshold               | .                 | .         | E          | .          | .          | .          | .          | .          | .          | .          | .          |
| Liver                   | .                 | T         | .          | .          | .          | .          | .          | .          | .          | .          | .          |
| Stomach lymphoma        | .                 | K         | .          | .          | .          | .          | .          | .          | .          | .          | .          |
| Threshold               | .                 | T         | .          | .          | .          | .          | .          | .          | .          | .          | .          |

Amino acid differences between *nef* in the liver and other tissues were included only if the amino acid was conserved at a frequency of 0.8 in the liver. Dots represent no difference between residues of the liver and the other tissue. Residues not shown are conserved in all tissues. Dashes represent insertions and/or deletions relative to HXB2. The core domain structure (residues 56–159 and 175–206) is highlighted and in bold.

Sequence data were originally reported in Lamers *et al.*<sup>18</sup>
